# Supplementary material for: Well-structured bimetallic surface capable of molecular recognition for chemoselective nitroarene hydrogenation
Source: Royal Society of Chemistry journal article supplement (doi:10.1039/c6sc00817h), 2016-01-01
Supplement: c6sc00817h1.pdf [file c6sc00817h1.pdf]

## Supporting Information

# Well-structured Bimetallic Surface Capable of Molecular Recognition for Chemoselective Nitroarene Hydrogenation

Shinya Furukawa,\* Katsuya Takahashi, and Takayuki Komatsu\*

*Department of Chemistry, Tokyo Institute of Technology, 2-12-1-E1-10 Ookayama, Meguro-ku, Tokyo 152-8551, Japan*

### Corresponding authors

Shinya Furukawa

Department of Chemistry, Graduate School of Science and Engineering, Tokyo Institute of Technology, 2-12-1-E1-10 Ookayama, Meguro-ku, Tokyo 152-8551, Japan

E-mail: [furukawa.s.af@m.titech.ac.jp](mailto:furukawa.s.af@m.titech.ac.jp), Tel: +81-3-5734-2602, Fax: +81-3-5734-2758

Takayuki Komatsu

Department of Chemistry, Graduate School of Science and Engineering, Tokyo Institute of Technology, 2-12-1-E1-10 Ookayama, Meguro-ku, Tokyo 152-8551, Japan

E-mail: [komatsu.t.ad@m.titech.ac.jp](mailto:komatsu.t.ad@m.titech.ac.jp), Tel: +81-3-5734-3532, Fax: +81-3-5734-2758

Table S1. Surface energy ( $\gamma$ ) and surface Rh–Rh coordination number in the first coordination sphere ( $N_{\text{Rh}}^{\text{surf}}$ ) for various low index Miller Planes of Rh-based alloys.<sup>a</sup>

| compound          | space group  | plane | $\gamma / \text{Nm}^{-2}$ | $N_{\text{Rh}}^{\text{surf}}$ | selected |
|-------------------|--------------|-------|---------------------------|-------------------------------|----------|
| RhZn              | $Pm\bar{3}m$ | (100) | 2.36(14)                  | 0                             |          |
|                   |              | (110) | 1.49                      | 2                             | ✓        |
|                   |              | (111) | 2.17(08)                  | 0                             |          |
| RhGa              | $Pm\bar{3}m$ | (100) | 2.25(69)                  | 0                             |          |
|                   |              | (110) | 1.11                      | 2                             | ✓        |
|                   |              | (111) | 1.72(40)                  | 0                             |          |
| RhIn              | $Pm\bar{3}m$ | (100) | 2.15(36)                  | 0                             |          |
|                   |              | (110) | 0.92                      | 2                             | ✓        |
|                   |              | (111) | 1.82(24)                  | 0                             |          |
| RhSn              | $P2_13$      | (210) | 1.27                      | 2                             |          |
|                   |              | (012) | 0.98                      | 3                             | ✓        |
|                   |              | (211) | 1.17                      | 3                             |          |
| RhPb              | $P6/mmm$     | (002) | 1.12(14)                  | 4                             | ✓        |
|                   |              | (201) | 0.74                      | 2                             |          |
|                   |              | (211) | 0.83                      | 1                             |          |
| RhBi              | $P6_3/mmc$   | (100) | 2.94(42)                  | 0                             |          |
|                   |              | (102) | 0.80                      | 0                             |          |
|                   |              | (110) | 0.75                      | 2                             | ✓        |
| RhPb <sub>2</sub> | $I4/mcm$     | (100) | 0.84(03)                  | 2                             | ✓        |
|                   |              | (001) | 0.98(02)                  | 0                             |          |
|                   |              | (211) | 0.49                      | 1                             |          |

<sup>a</sup> Low-index Miller planes with low  $\gamma$  and high  $N_{\text{Rh}}^{\text{surf}}$  were selected as surfaces that were expected to be exposed and active for hydrogenation reactions and CO adsorption. <sup>b</sup> The number with parenthesis indicates the center value and the range (half width) of  $\gamma$ .

Table S2. Theoretical and experimental frequencies of CO adsorbed on various Rh-based planes.

| site       | surface           | geometry | Vibrational frequency of adsorbed CO /cm <sup>-1</sup> |                              |                              |                   |
|------------|-------------------|----------|--------------------------------------------------------|------------------------------|------------------------------|-------------------|
|            |                   |          | theoretical <sup>a</sup><br>(this study)               | experimental<br>(this study) | experimental<br>(literature) |                   |
| atop       | Rh                | (111)    | (3×3)                                                  | 2019                         |                              | 2015 <sup>1</sup> |
|            |                   |          | (2×2)                                                  | 2032                         |                              |                   |
|            |                   |          | ( $\sqrt{3}\times\sqrt{3}$ )R30°                       | 2046                         |                              | 2041 <sup>1</sup> |
|            |                   |          | c(4×2)-2CO                                             | 2053                         | 2057                         |                   |
|            |                   |          | (2×2)-3CO                                              | 2066                         |                              | 2070 <sup>1</sup> |
|            | RhIn              | (100)    | (2×2)                                                  | 2010                         |                              |                   |
|            |                   | (110)    | (2×2)                                                  | 2006                         | 2002                         |                   |
|            |                   | (111)    | (2×2)                                                  | 1994                         |                              |                   |
|            | RhZn              | (100)    | (2×2)                                                  | 1992                         |                              |                   |
|            |                   | (110)    | (2×2)                                                  | 2007                         | 2012                         |                   |
|            |                   | (111)    | (2×2)                                                  | 1981                         |                              |                   |
|            | RhBi              | (100)    | (2×2)                                                  | 1964                         |                              |                   |
|            |                   | (102)    | (2×2)                                                  | 1962, 1948                   |                              |                   |
|            |                   | (110)    | (2×2)                                                  | 1973                         | 1976                         |                   |
|            | RhPb              | (002)    | (2×2)                                                  | 1981                         | 1984                         |                   |
|            |                   | (201)    | (2×1)                                                  | 1931                         |                              |                   |
|            |                   | (211)    | (2×1)                                                  | 1956, 1939                   |                              |                   |
|            | RhPb <sub>2</sub> | (100)    | (2×2)                                                  | 1982                         | 1977                         |                   |
| (001)      |                   | (2×1)    | 1993                                                   |                              |                              |                   |
| (211)      |                   | (2×1)    | 1935                                                   |                              |                              |                   |
| bridge     | Rh                | (111)    | (2×2)                                                  | 1909                         | n. d.                        | 1931 <sup>1</sup> |
|            | RhIn              | (110)    | (2×2)                                                  | 1864                         | n. d.                        |                   |
| fcc hollow | Rh                | (111)    | (2×2)-3CO                                              | 1891                         | 1880                         | 1861 <sup>1</sup> |
| gas phase  |                   |          |                                                        | 2143                         |                              | 2143 <sup>2</sup> |

<sup>a</sup> As-calculated values scaled by 1.0386 are reported as theoretical values. The scaling factor was determined as the ratio of the experimental and as-calculated values for gas phase CO.

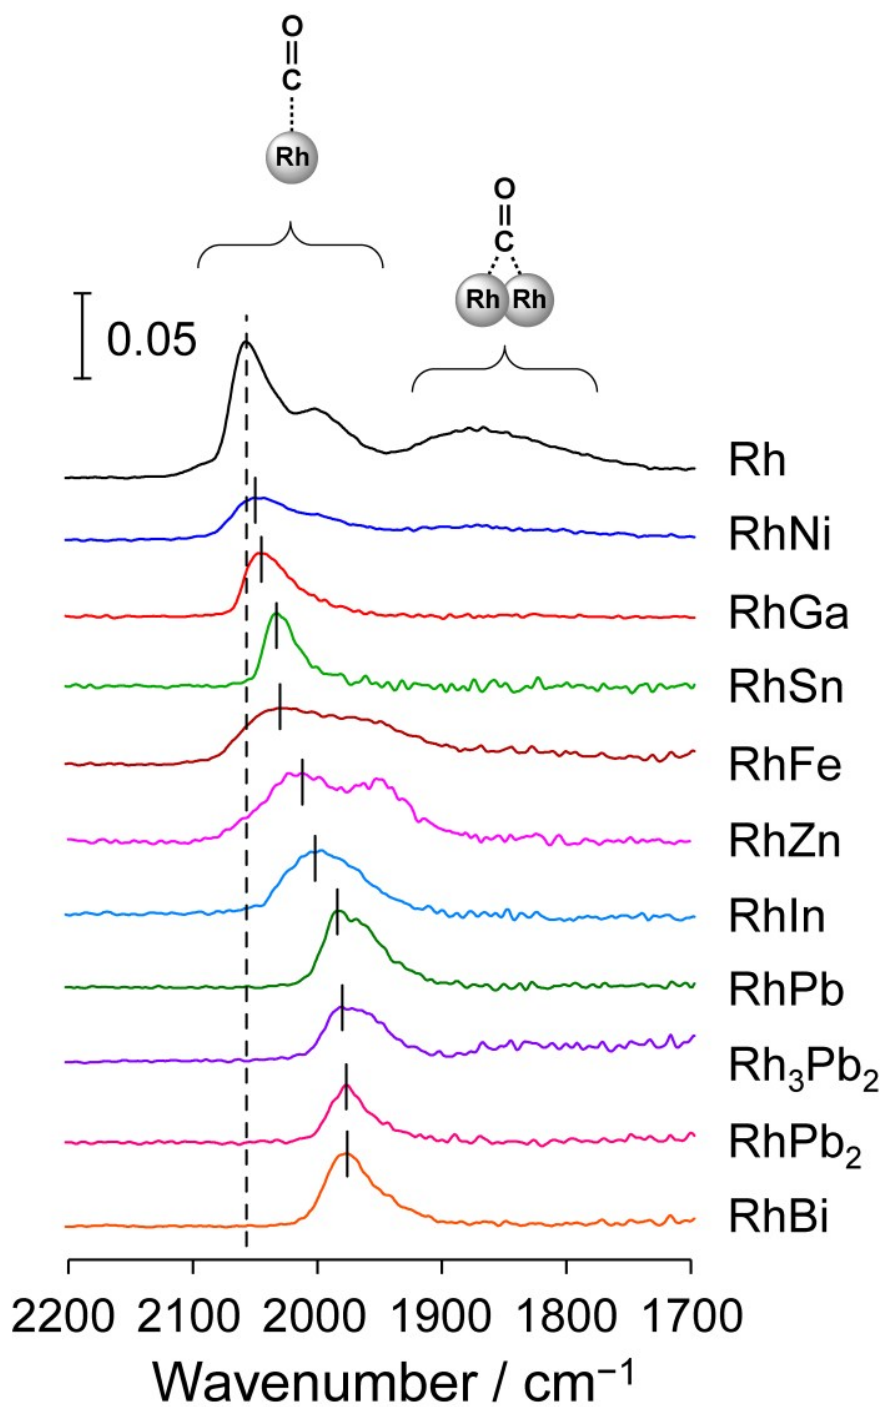

Figure S1. FT-IR spectra of CO adsorbed on Rh-based catalysts at 25°C. Vertical lines indicate the peak positions for linearly adsorbed CO. Spectra of which peak intensities are lower than 30% of those for saturation coverage are shown.

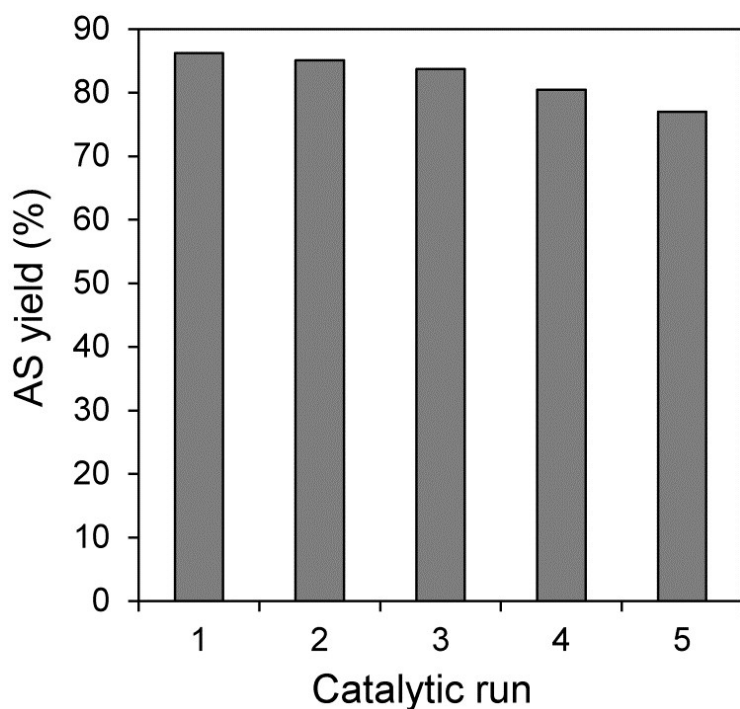

Figure S2. Reusability of RhIn/SiO<sub>2</sub> catalyst in NS hydrogenation at 75°C. To evaluate validly the change in catalytic performance, the reaction time was set to 1.5 h so that NS conversion at the first run did not saturate.

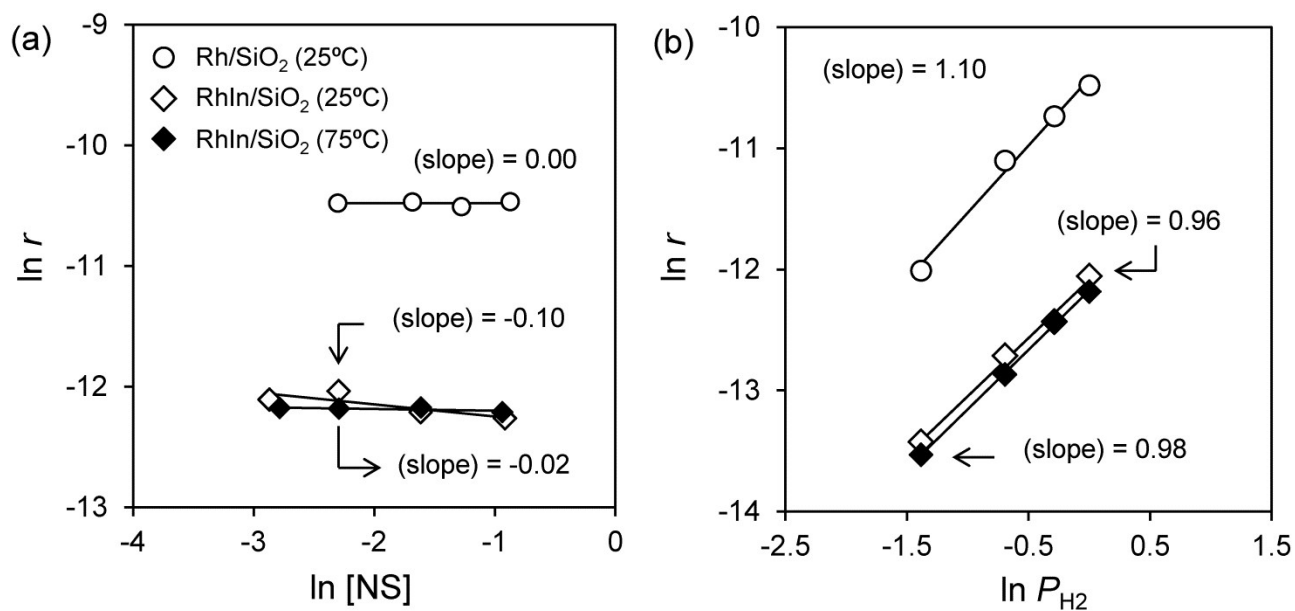

Figure S3. Dependences of reaction rate on (a) NS concentration and (b) H<sub>2</sub> pressure.

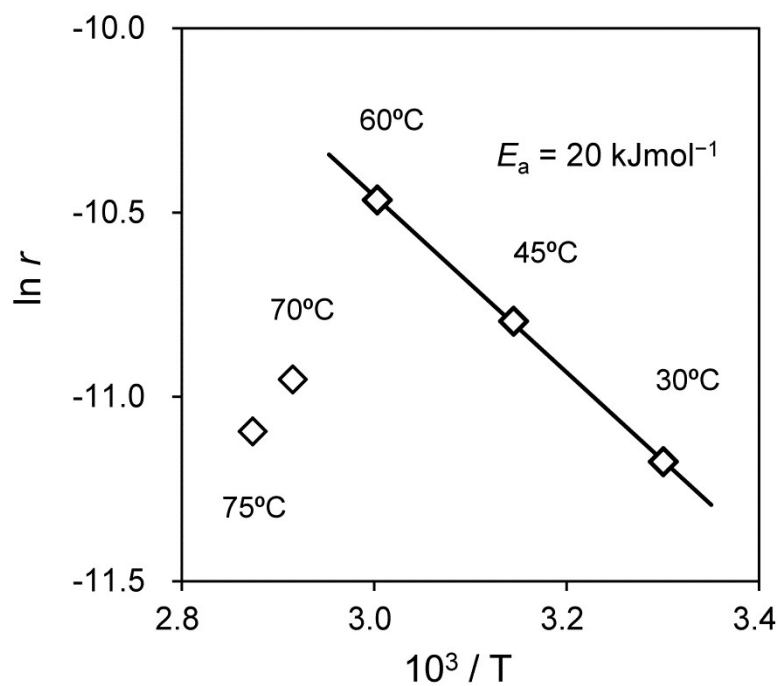

Figure S4. Arrhenius-type plot for NS hydrogenation over RhIn/SiO<sub>2</sub> under 1 atm H<sub>2</sub>. The reaction condition was identical to that for Table 1.

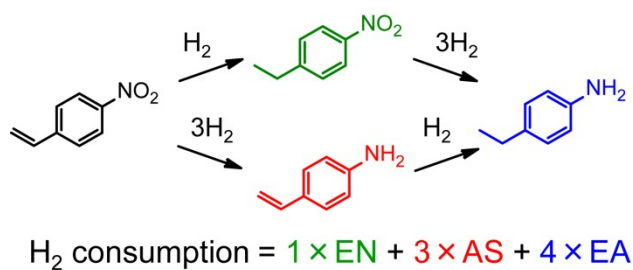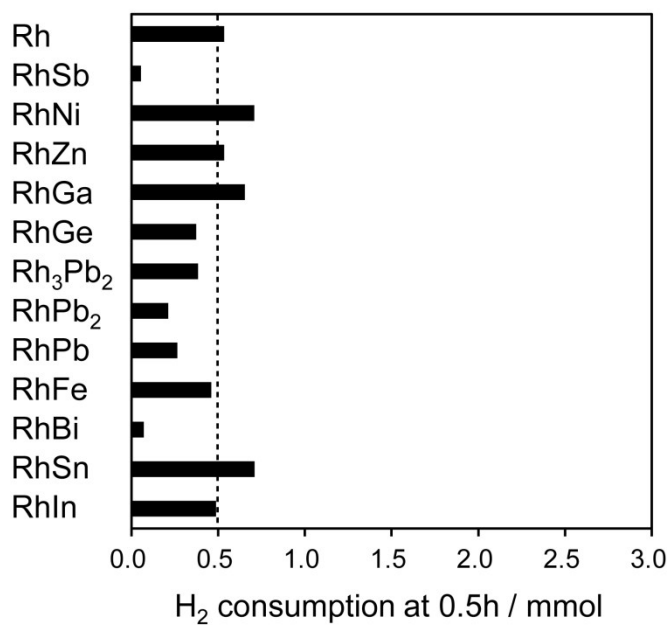

Figure S5. H<sub>2</sub> consumption at 0.5 h in NS hydrogenation over various Rh-based catalysts.

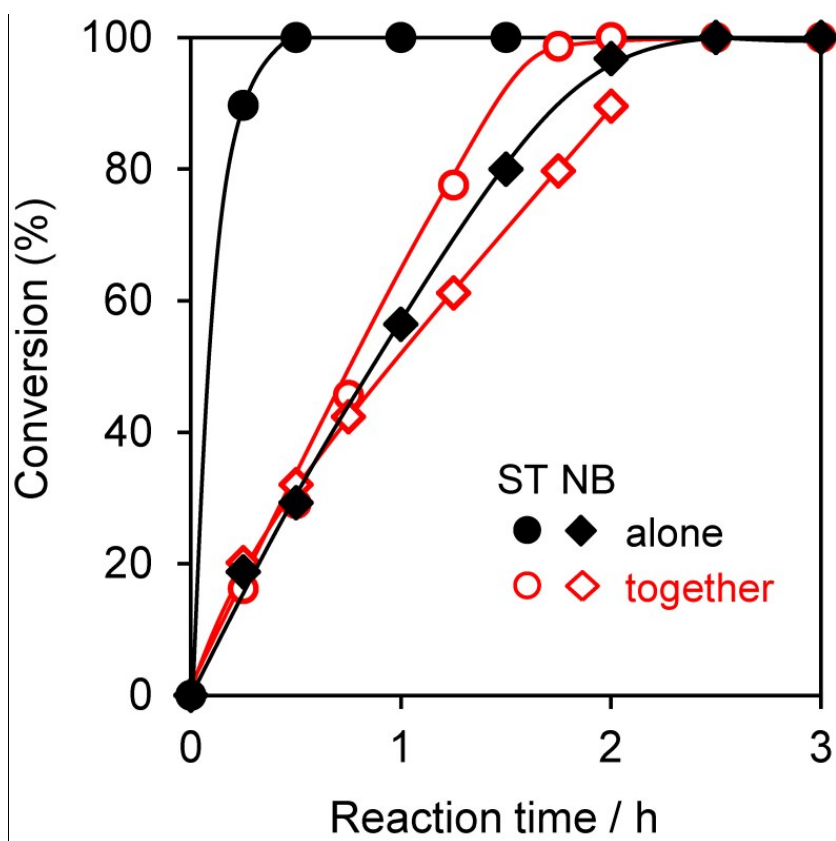

Figure S6. Time courses of ST and NB conversion when these substrates were used alone or together over RhZn/SiO<sub>2</sub>. The reaction condition was identical to that for Table 1.

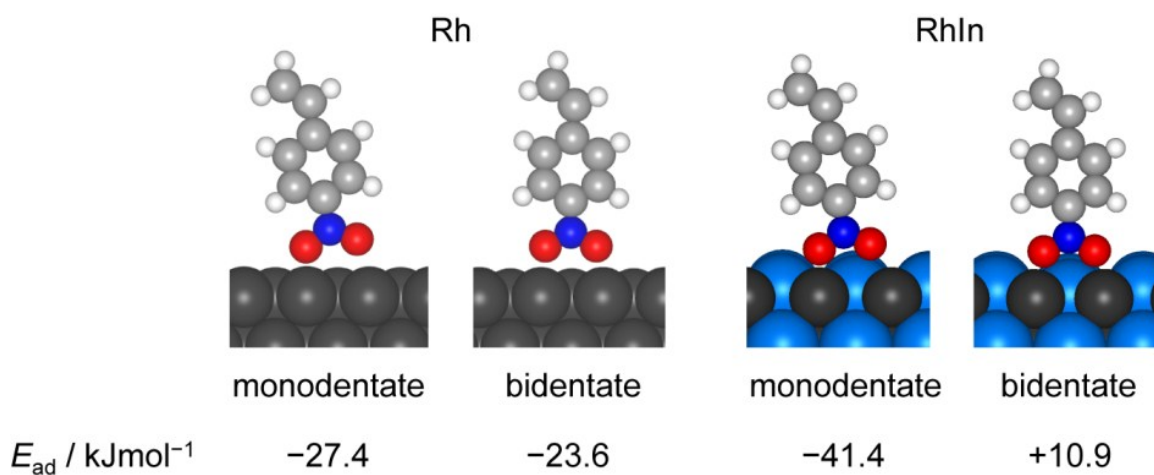

Figure S7. Optimized structures of NS adsorbed on Rh and RhIn with monodentate and bidentate ligation of the nitro group. The corresponding adsorption energies ( $E_{ad}$ ) are also shown.

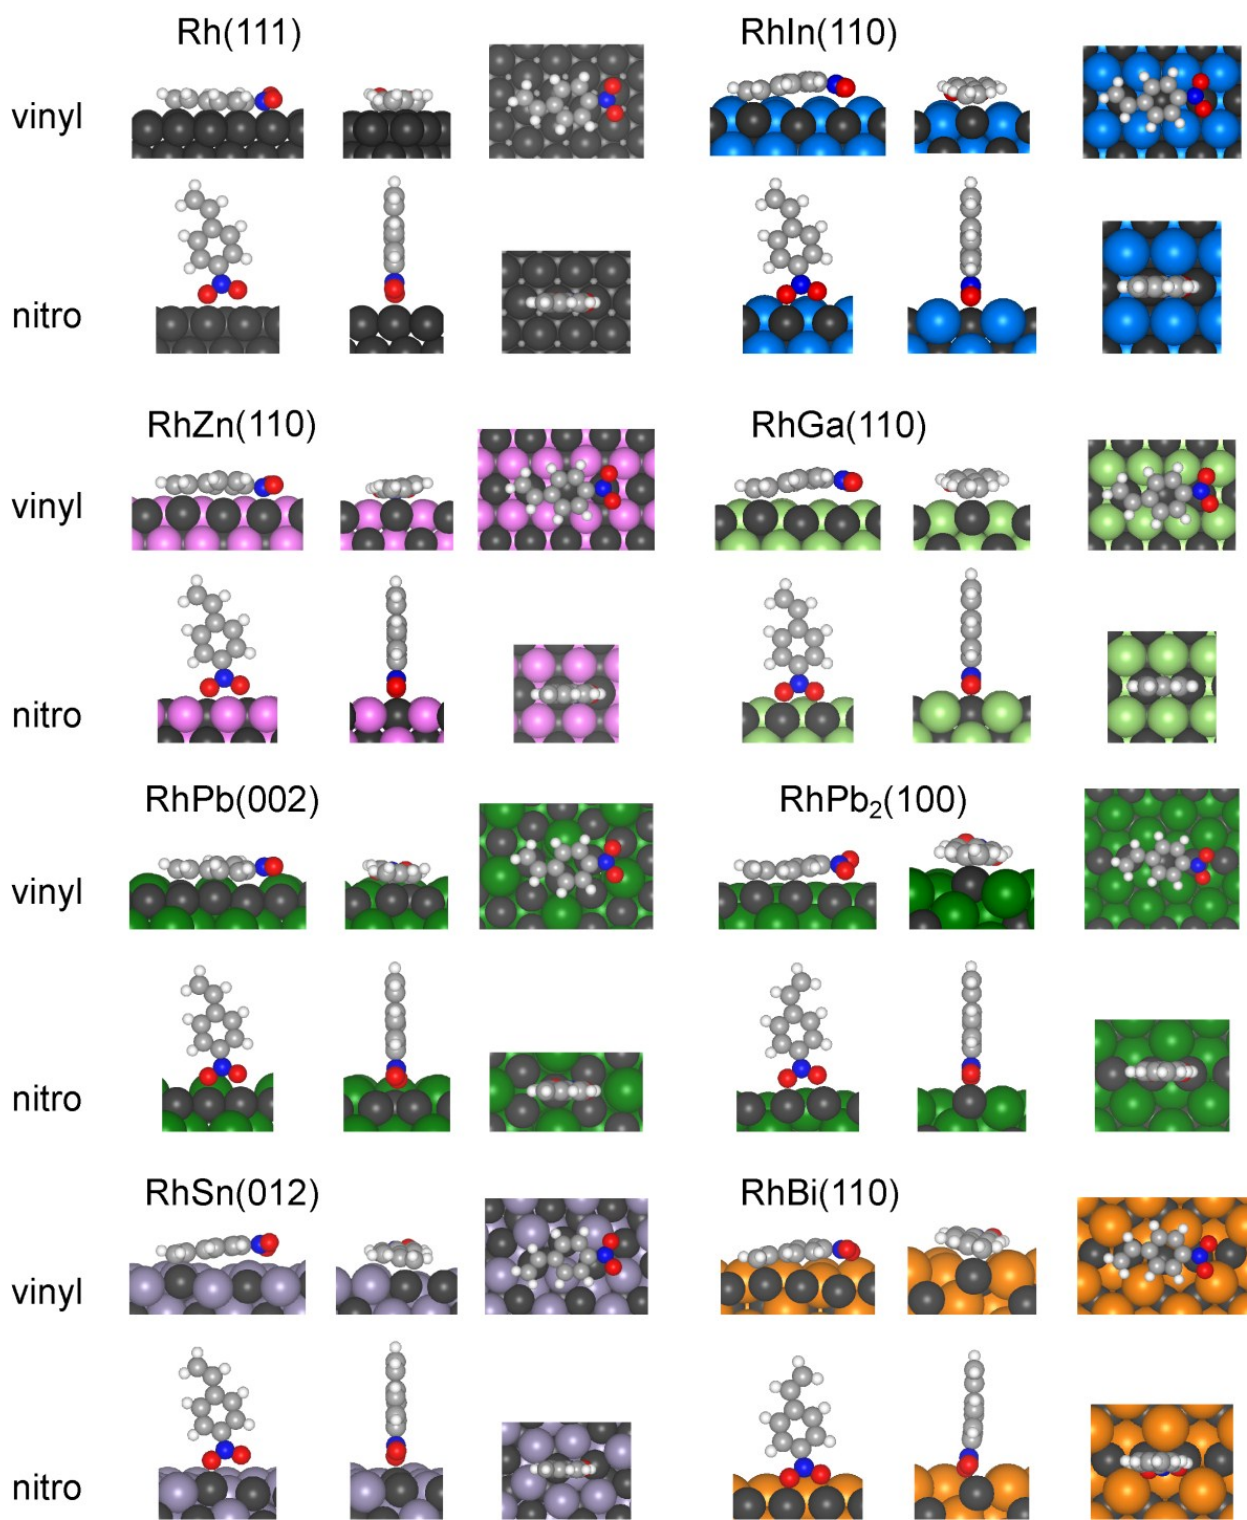

Figure S8. Optimized structures of NS adsorbed on various Rh-based materials.



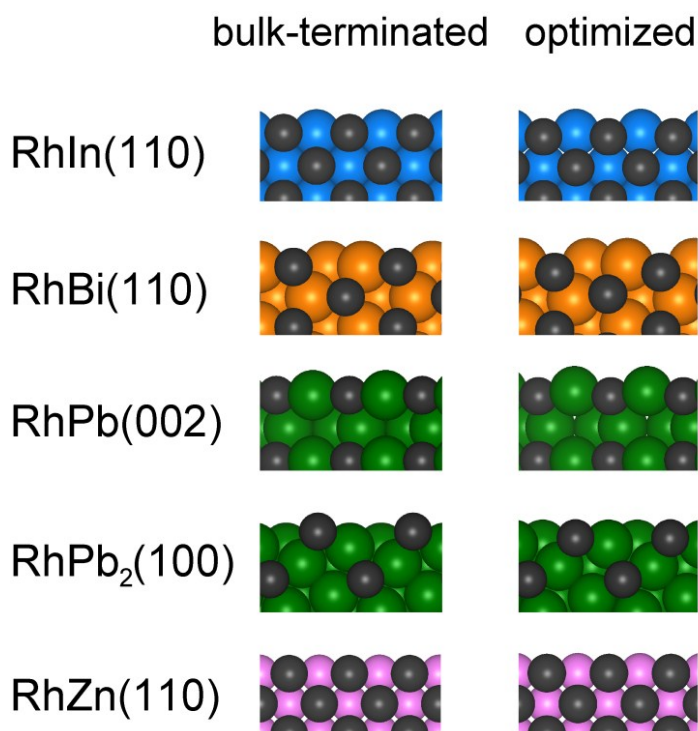

Figure S9. Bulk-terminated and optimized structures of several Rh-based planes.

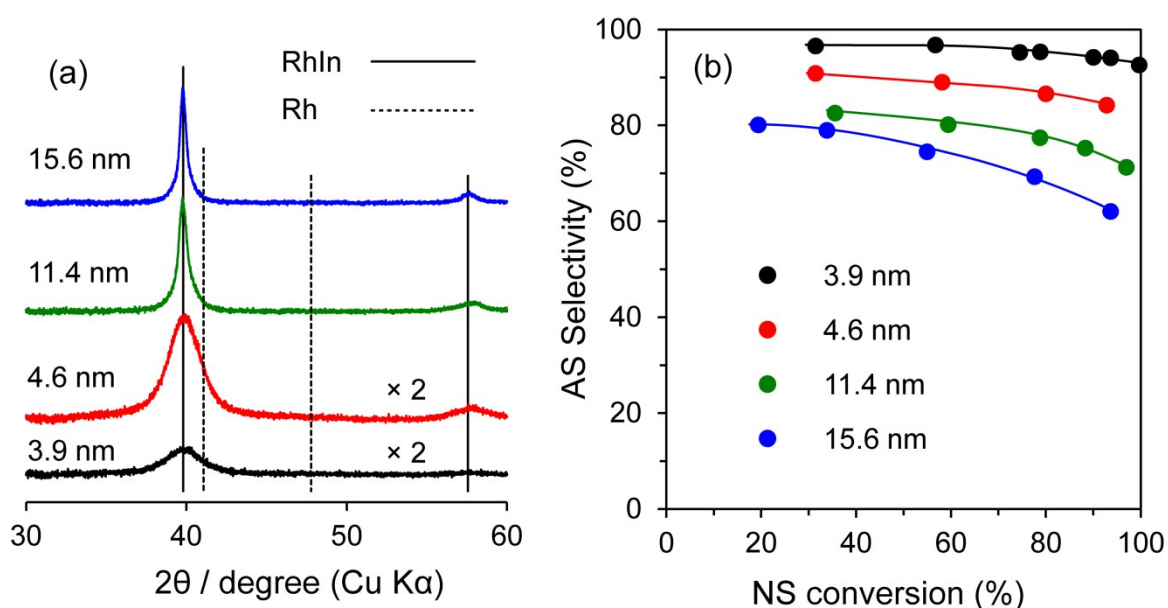

Figure S10. (a) XRD patterns of RhIn/SiO<sub>2</sub> with various crystallite sizes. (b) Conversion-selectivity curves obtained in NS hydrogenation using these RhIn/SiO<sub>2</sub> catalysts. The reaction condition is identical to that in the caption of Figure 3. RhIn(4.6) was obtained by annealing of RhIn(3.9) under He flow at 900°C for 1 h. RhIn(11.4) and RhIn(15.6) were prepared using parent Rh/SiO<sub>2</sub> with 6 and 9 nm of crystallite sizes, respectively. These Rh/SiO<sub>2</sub> were prepared without calcination and with reduction at 400°C and 600°C, respectively.

## References

1. R. Linke, D. Curulla, M. J. P. Hopstaken and J. W. Niemantsverdriet, *J. Chem. Phys.*, 2001, **115**, 8209-8216.
2. D. Scarano, S. Bordiga, C. Lamberti, G. Spoto, G. Ricchiardi, A. Zecchina and C. O. Areal, *Surf. Sci.*, 1998, **411**, 272-285.
